# Supplementary material
Source: publisher site journal article supplement (https://www.degruyter.com/publication/journal_key/JJL/downloadAsset/JJL_Template_December_2023.pdf)
Supplement: Supplementary file 1 [file JJL_Template_December_2023.pdf]

Your name\* and xxx

[Note: The JJJ is a double-blind, peer-reviewed journal; your identity should not be revealed at the time of submission. Your name will be removed for initial review.]

## Title of the paper

Received XXX; accepted for publication XXX [Note: We will fill out this information.]

[Note: Ideally, the maximum article length will be of 8,000 words (approximately 50,000 characters including spaces) including tables, references, captions, and footnotes. But the journal tries to be flexible depending on various factors (e.g., content, room availability).]

**Abstract:** Abstract of the paper (about 100–150 words). [Note: Citations to sources are not permitted in the abstract.]

**Keywords:** 3–4 words/phrases [Note: Alphabetical order, separated by commas.]

### 1 Introduction

In Japanese the English-style subject is divided into two categories: the topic and the syntactic subject. A form that embraces these two categories exists in Japanese, namely, the topic that is identical with the syntactic subject, and this can be regarded as a prototypical subject in Japanese (Shibatani 1976a, 1976b, and 1990). The non-topic nominative subject is syntactically subject, but it lacks a property of the prototype, namely, that it expresses the object of an experiential judgment (Jacobsen 1992; Shibatani 1990). [Notes: Works by different authors should be listed in alphabetical order. For several works by one author, the name should not be repeated. Separate the citations of different authors by semicolons. Arrange two or more works by the same author(s) by the year of publication.] ... This article addresses ...

### 2 Section title

There is also a syntactic subject that lacks the important property of nominative marking, namely, the subject marked by the dative *ni*. This type of “dative subject” [Use rounded quotation marks] finds analogs in many other languages in which predicates expressing the notions of liking/disliking, existence/possession, necessity and ability mark the experiencer subject with the dative case. Finally, there is a class of nominal elements that is marked by the nominative *ga*, but systematically lacks other syntactic subject properties. Some of these alternate with the particle *o*, which indicates their object status, as in *Boku wa biiru ga/o nomi-tai* ‘I want to drink beer’.

2<sup>nd</sup> paragraph .....

3<sup>rd</sup> paragraph .....

- (1) *Kono kurai noni sanpo desu ka.*<sup>1</sup>  
this dark in spite of walk COP Q

---

\* Corresponding author: Your name, Affiliation, Address, Japan/U.S.A, Your e-mail address@xxx

<sup>1</sup> Abbreviations used are as follows: NOM (Nominative), ACC (Accusative), GEN (Genitive), QUO (Quotation), NMLZ (Nominalizer), Q (Question), IP (Interactional Particle), VOL (Volitional), HON (Honorific), TOP (Topic), PASS (Passive), EMPH (Emphatic) and COP (Copula).

‘You are taking a walk even though it’s so dark!’  
[Originally from Nakamizo (2002: 21)]<sup>2</sup>

[Note: As seen above, the Kunrei Romanization system should be employed to show examples.]

|        |        |          |         |
|--------|--------|----------|---------|
| 「地震」   | zisin  | ×jishin  |         |
| 「小さい」  | tiisai | ×chiisai | ×chīsai |
| 「ちょっと」 | tyotto | ×choto   | ×chotto |
| 「風呂」   | huro   | ×furo    |         |
| 「女性」   | zyosei | ×josei   |         |

Notes: *Italics* should be used for:

- Words, phrases, and sentences treated as linguistic examples
- Foreign (non-English) words or expressions or when special emphasis is intended
- Titles of books, published documents, newspapers, and journals
- For probability (P), binominals
- Emphasizing a word or phrase in a quotation indicating [emphasis mine]

---

Insert Table 1 about here.

---

Table 1: Inter-topic correlations: Correlations between the total number of words, the total number of different words, and the total number of clauses across the two topics

[Note: For tables, figures, and illustrations, use sentence case for table and figure captions, as well as for column heads.]

|                                 | Total number of words | Injury-related stories<br>Total number of different words | Total number of clauses |
|---------------------------------|-----------------------|-----------------------------------------------------------|-------------------------|
| Early childhood memories        |                       |                                                           |                         |
| Total number of words           | .74****               | .77****                                                   | .82****                 |
| Total number of different words | .75****               | .80****                                                   | .82****                 |
| Total number of clauses         | .62***                | .67****                                                   | .72****                 |

\*\*\*  $p < .001$ . \*\*  $p < .0001$ .

---

Insert Figure 1 about here.

---



---

<sup>2</sup> English translations of examples and quotes from Japanese sources are provided by the author.

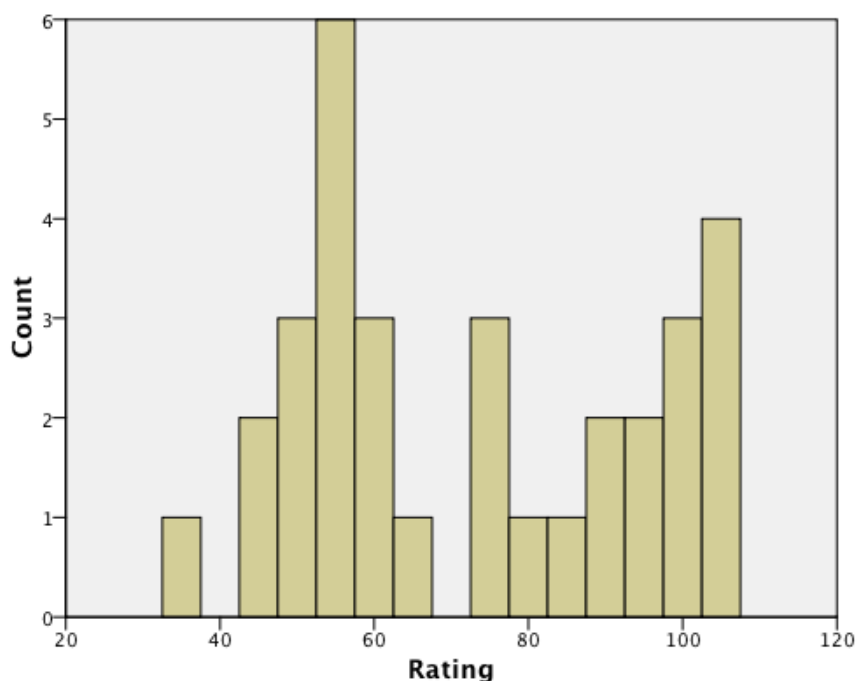

Figure 1: Distribution of evaluations of JFL learners by native Japanese speakers

**Acknowledgments:** Article note: This paper was presented at .....acknowledgment.

**Appendices:** [Note: Appendices should be placed before the references.]

## References

[Notes:

- Give the full first names of authors and editors.
- Initials require periods and should be spaced, e.g., Ronald W. Langacker.

Consult with the Mouton stylesheet (e.g., the use of en dashes on page 5). The Hepburn Romanization system should be employed to represent Japanese words in the References section. Use a macron, a mark placed over a vowel in order to indicate that the vowel is long, ā, ē, ī, ō, ū. References should follow the examples below:]

- Asahi, Yoshiyuki. 2008. *Nyūtaun Kotoba no Keisei-katei ni Kansuru Shakaigengogakuteki Kenkyū* [A sociolinguistic study on the process of the formation of “new town” language]. Tokyo: Hituzi Syobo.
- Bugaeva, Anna. 2010. Ainu applicatives in typological perspective. *Studies in Language* 34(4). 749–801.
- Frellesvig, Bjarke & John Whitman (eds.). 2008. *Proto-Japanese: Issues and prospects* (Amsterdam Studies in the theory and history of linguistic science, series IV: Current issues in linguistic theory). Amsterdam and Philadelphia: John Benjamins.
- Jacobsen, Wesley M. 1992. *The transitive structure of events in Japanese*. Tokyo: Kurosio Publishers.
- Jakobson, Roman & Morris Halle. 2002 [1956]. *Fundamentals of language*, 2nd edn. Berlin and New

- York: Mouton de Gruyter.
- Kageyama, Taro. 1996. *Dōshi Imiron* [Verb semantics]. Tokyo: Kurosio Publishers.
- Kibe, Nobuko. 1983. Fuzokugo no akusento ni tsuite [On the accent of bound words]. *Kokugogaku* 134. 23–42.
- Kinsui, Satoshi. 2003. *Bācharu Nihongo: Yakuwarigo no Nazo* [Virtual Japanese: The mystery of role language]. Tokyo: Iwanami.
- Kishimoto, Hideki. 2001. Kabenuri kōbun [Wall-painting constructions]. In Taro Kageyama (ed.), *Nichieitaishō Dōshi-no Imi-to Kōbun* [The meanings of verbs and their constructions in Japanese and English], 100–126. Tokyo: Taishukan.
- Kubozono, Haruo. 2011. Pitch cues to the perception of consonant length in Japanese. *Proceedings of the 17th International Congress of Phonetic Sciences*, 20–30.
- Kunihiro, Tetsuya, Fumio Inoue & Daniel Long (eds.). 1998. *Takesi Sibata: Sociolinguistics in Japanese contexts* (Contributions to the sociology of language 81). Berlin: Mouton de Gruyter.
- Kuroda, Shige-Yuki. 1965. Generative grammatical studies in the Japanese language. Doctoral dissertation, MIT.
- Minami, Masahiko. 2002. Vocabulary development in English-Japanese bilingual children: Correspondence of achievement levels in first and second languages. In Yasuhiro Shirai, Harumi Kobayashi, Susanne Miyata, Keiko Nakamura, Tamiko Ogura & Hidetosi Sirai (eds.), *Studies in language sciences* 2, 261–278. Tokyo: Kurosio Publishers.
- Miyagawa, Shigeru & Koji Arikawa. 2007. Locality in syntax and floated numeral quantifiers. *Linguistic Inquiry* 38(4). 645–670.
- Miyara, Shinsho. 2009. Two types of nasal in Okinawan. *Gengo Kenkyu* 136. 177–199.
- Nakayama, Mineharu. 1988. *Acquisition of lexical and structural properties in Japanese*. Storrs, CT: University of Connecticut dissertation.
- Noda, Hisashi, Takashi Masuoka, Mayumi Usami & Noriyuki Takubo. 2002. *Nihongo no Bunpō 4: Fukubun to Danwa* [Japanese grammar 4: Complex sentences and discourse]. Tokyo: Iwanami.
- Pardeshi, Prashant & Peter E. Hook. 2010. When Marathi meets Farsi: A case study in language contact. Paper presented at the 13th International Conference on Maharashtra: Culture and Society, University of Saints Cyril and Methodius in Trnava, Bratislava, Slovakia, 18–20 August.
- Shibatani, Masayoshi (ed.). 1976a. *Syntax and semantics 5: Japanese generative grammar*. New York: Academic Press.
- Shibatani, Masayoshi (ed.). 1976b. *Syntax and semantics 6: The grammar of causative constructions*. New York: Academic Press.
- Tsujimura, Natsuko (ed.). 1999. *The handbook of Japanese linguistics*. Malden, MA: Blackwell Publishers.

ADDRESS FOR CORRESPONDENCE

[NOTE: WE WILL REMOVE THIS INFORMATION WHEN WE SEND IT TO THE PUBLISHER.]

Your name

Affiliation

Address

Japan/U.S.A.

Your e-mail address@xxx

[For further information, see [De Gruyter Mouton Journal Style Sheet](https://www.degruyter.com/staticfiles/pdfs/mouton_journal_stylesheet.pdf):  
[https://www.degruyter.com/staticfiles/pdfs/mouton\\_journal\\_stylesheet.pdf](https://www.degruyter.com/staticfiles/pdfs/mouton_journal_stylesheet.pdf)]
